# Supplementary material for: The Influence of Irreversible Electroporation Parameters on the Size of the Ablation Zone and Thermal Effects: A Systematic Review
Source: PubMed Central journal article supplement — Technol Cancer Res Treat. 2023 Jan 4;22:15330338221125003. doi: 10.1177/15330338221125003 (PMC9830580; doi:10.1177/15330338221125003), 2023-01-04
Supplement: sj-pdf-1-tct-10.1177_15330338221125003.pdf [file sj-pdf-1-tct-10.1177_15330338221125003.pdf]

## **Supplementary S1**

## **Search strategy**

### **PubMed**

The search was performed in the “Advanced search” mode.

NanoKnife[tiab] OR Irreversible electroporation\*[tiab] OR Reversible electroporation\*[tiab] OR ((Non-thermal[tiab] OR Nonthermal[tiab]) AND Ablation[tiab]) OR Electropermeabili\*[tiab] OR Pulsed electric field\*[tiab] OR Pulsed electrical field\*[tiab] OR Pulse electric field\*[tiab] OR Pulse electrical field\*[tiab]

### **Web of Science**

The search was performed in the “Advanced search” mode. No restrictions were added to the search.

TS = (NanoKnife OR Irreversible electroporation\* OR Reversible electroporation\* OR ((Non-thermal OR Nonthermal) AND Ablation) OR Electropermeabili\*)

### **Embase**

The search was performed in the “Advanced search” mode.

Irreversible electroporation/

OR Irreversible electroporation device/

OR (NanoKnife OR Irreversible electroporation\* OR Reversible electroporation\* OR ((Non-thermal or nonthermal) AND ablation) OR Electropermeabili\* OR Pulsed electric field\* OR Pulsed electrical field\* OR Pulse electric field\* OR Pulse electrical field\*).ti,ab,kw).af

### **IEEE Xplore Digital Library**

The search was performed in the “Advanced search” mode for all metadata. No restrictions were added to the search. Electroporation was used as a Mesh term.

“All Metadata”: NanoKnife OR Irreversible electroporation\* OR Reversible electroporation\* OR ((Non-thermal OR nonthermal) AND ablation) OR Electropermeabili\* OR Electroporation OR

“Mesh\_Terms”: Electroporation

### **American Society of Mechanical Engineers Digital Collection**

The search was performed in the “All Content” mode.

Electroporation

**Quality assessment questions**

1. Which type of model is used in the study? \*\* Human patient, \*validated model as previously described or frequently used in literature (animal model (in vivo/ ex vivo), tissue phantom, gel, potato)
2. Is a power analysis performed / an adequate sample size present / no overlap in results present? +Yes, - No
3. Are all hypotheses stated in the included study tested? + Yes, - No
4. Is the description of the methods replicable? + Yes, ? Partially, - No
5. Is ethical approval obtained in case of a patient or animal study? + Yes, - No
6. Is the raw data of the ablation zone or temperature measurements available? +Yes, -No
7. Is the statistical method appropriate? + Yes, - No
8. Is the number of observations consistent / is lost to follow-up adequately described? + Yes, - No
9. Are the conclusions justified by the results? +Yes, ? Partially, -No

**Additional information per quality assessment section**

2. A sample size of  $n \geq 10$  is assumed as an adequate sample size. When overlap in data was present between individual experimental groups, for example investigating other combinations of electroporation parameter values, question 2 was answered with No as well. Experimental group results must be sufficiently apart to be able to reliably test the hypothesis.

4. In this section is focused on the methods part of the extracted data included in this review. The method section is considered as replicable when all electroporation parameter settings, equipment and details regarding the timing between the last ablation and sacrifice were reported. As well as an extensive and clear description of the method to determine the ablation zone size and obtain the temperature results. This section is judged as ? in case a detail (e.g., pulse interval between sets of consecutive pulses) is not reported and as – when a few details or a main point (e.g., used generator, method to analysis temperature data or determine the ablation zone size), are not described.

6. Raw data is present when the results are reported of every single experiment. Even when an experiment is repeated five time to investigate the reproducibility of the results. In case the surface or volume of the ablation zone are calculated by a formula, the input values (length/width or height) of the ablation zone should be reported as well. Mean values are not considered as presence of raw data.

7. The statistical method could be regarded as appropriate when in the first place is examined when the data was normally distributed or not. Only based on this assessment could be determined when the right statistical test was used. In almost all articles has not been investigated whether the data was normally distributed. The statistical method was regarded as not appropriate in these cases.

8. The number of observations was considered as inconsistent when the number of animals, gels or potatoes used and/or number of ablations per experimental group were not reported.

**Supplementary S3**

**General information per included study**

**Table 1.** Study characteristics of all included articles. Not applicable (NA). Only the characteristics of the in this review included ablation zone and/or temperature outcomes were described in this table.

| Author (year)                                 | General information  |                                                        |                                                                         |                                       |                                                                             |                                                              | Temperature (T) & Ablation Zone (AZ) |                                                                                                                                           |                                                                                                                                                                                                                              |              |                                            |                                    |
|-----------------------------------------------|----------------------|--------------------------------------------------------|-------------------------------------------------------------------------|---------------------------------------|-----------------------------------------------------------------------------|--------------------------------------------------------------|--------------------------------------|-------------------------------------------------------------------------------------------------------------------------------------------|------------------------------------------------------------------------------------------------------------------------------------------------------------------------------------------------------------------------------|--------------|--------------------------------------------|------------------------------------|
|                                               | Model                | Organ & Location                                       | N (samples, AZ)                                                         | Generator & Pulse type                | Electrode type & Manufacturer                                               | Varied electroporation parameter settings                    | Focus on T or AZ                     | Visualization AZ & Endpoint                                                                                                               | Method AZ measurements & Orientation to needles                                                                                                                                                                              | 1D/2D /3D AZ | Method & Location temperature measurements | Absolute (Abs) or Relative (Rel) T |
| <b>Appelbaum et al. (2014)</b> <sup>1</sup>   | Porcine, In vivo     | Liver; Not specified                                   | Both not described for the specific experiments included in this review | NanoKnife<br>AngioDynamics;<br>Square | Four monopolar (18 Gauge) electrodes;<br>AngioDynamics                      | Pulse number                                                 | AZ                                   | Gross pathologic examination; 90-120 min after the last IRE ablation                                                                      | Macroscopic measurements; Perpendicular to electrode insertion path                                                                                                                                                          | 1D           | NA                                         | NA                                 |
| <b>Ben-David et al. (2012)</b> <sup>2</sup>   | Porcine, In vivo     | Liver; Throughout the entire liver                     | Both not described for the specific experiments included in this review | NanoKnife<br>AngioDynamics;<br>Square | Two monopolar (18 Gauge) electrodes;<br>AngioDynamics                       | Voltage, active needle length, pulse length and pulse number | AZ                                   | Gross pathologic examination; 90-120 min after the last IRE ablation. Liver was sectioned at 3-5 mm interval for ablation zone assessment | Macroscopic measurements; Perpendicular to electrode insertion path                                                                                                                                                          | 1D           | NA                                         | NA                                 |
| <b>Berkenbrock et al. (2018)</b> <sup>3</sup> | Potato               | NA; Potato slice of 20 mm thickness and 40 mm diameter | 36 potato slices, 36 AZ                                                 | Not specified, Square                 | Two monopolar needles (Ø 0.6 mm); Manufacturer or custom-made not specified | Voltage                                                      | AZ                                   | Macroscopic visualization by photographs of darkened area; 24 hours after ablation                                                        | Macroscopic measurements with image processing (thresholding and number of pixels present in the ablated area) in Matlab and the area is measured in ImageJ by color thresholding; Perpendicular to electrode insertion path | 2D           | NA                                         | NA                                 |
| <b>Bhonsle et al. (2016)</b> <sup>4</sup>     | Perfused Organ Model | <u>POM</u><br>Liver; Not specified                     | <u>POM</u><br>Not described for the specific                            | BTX ECM 830;<br>Square                | Two monopolar (19 Gauge)                                                    | Voltage and pulse number                                     | AZ                                   | Gross pathologic examination.                                                                                                             | <u>POM</u><br>Macroscopic measurements;                                                                                                                                                                                      | 1D           | NA                                         | NA                                 |

| Author (year)                               | General information                                   |                                                                  |                                                                                                                                              |                                 |                                                    |                                           | Temperature (T) & Ablation Zone (AZ) |                                                                                                                                                                                                                                                                                                         |                                                                                                                                                   |              |                                                                                                                                                                                                                                   |                                    |
|---------------------------------------------|-------------------------------------------------------|------------------------------------------------------------------|----------------------------------------------------------------------------------------------------------------------------------------------|---------------------------------|----------------------------------------------------|-------------------------------------------|--------------------------------------|---------------------------------------------------------------------------------------------------------------------------------------------------------------------------------------------------------------------------------------------------------------------------------------------------------|---------------------------------------------------------------------------------------------------------------------------------------------------|--------------|-----------------------------------------------------------------------------------------------------------------------------------------------------------------------------------------------------------------------------------|------------------------------------|
|                                             | Model                                                 | Organ & Location                                                 | N (samples, AZ)                                                                                                                              | Generator & Pulse type          | Electrode type & Manufacturer                      | Varied electroporation parameter settings | Focus on T or AZ                     | Visualization AZ & Endpoint                                                                                                                                                                                                                                                                             | Method AZ measurements & Orientation to needles                                                                                                   | 1D/2D /3D AZ | Method & Location temperature measurements                                                                                                                                                                                        | Absolute (Abs) or Relative (Rel) T |
|                                             | (POM, animal not specified), Ex vivo; Canine, In vivo | <u>Canine</u><br>Liver; Not specified                            | experiments included in this review; 67 AZ<br><br><u>Canine</u><br>Not described for the specific experiments included in this review; 15 AZ |                                 | electrodes; AngioDynamics                          |                                           |                                      | <u>POM</u><br>After 2 hours of additional perfusion after last IRE ablation, TTC stained sections.<br><br><u>Canine</u><br>Harvested 6 hours after IRE ablation, liver sections containing AZ were preserved in 10% buffered formalin for 48 hours before sliced, photographed and analyzed with ImageJ | Perpendicular to electrode insertion path<br><br><u>Canine</u><br>Macroscopic measurements with ImageJ; Perpendicular to electrode insertion path |              |                                                                                                                                                                                                                                   |                                    |
| <b>Canvasser et al. (2018) <sup>5</sup></b> | Porcine, In vivo                                      | Kidney; Left upper, left lower, right upper and right lower pole | 13 animals; 50 AZ, of which 48 AZ used for size measurements                                                                                 | NanoKnife AngioDynamics; Square | Two monopolar (18 Gauge) electrodes; AngioDynamics | Voltage and active needle length          | AZ and T                             | Gross pathologic examination; 0, 7 or 14 days after IRE                                                                                                                                                                                                                                                 | Macroscopic measurements in combination with formula prolate sphere; Perpendicular and parallel to electrode insertion path                       | 3D           | Real time temperature monitoring by 4 fiber-optic temperature sensors: 1 at 1.0 cm depth in the middle of both electrodes, sensor 2 and 3 adjacent to electrode 2 and 3 and sensor 4 1.0 cm medial to electrode 1 (peripheral AZ) | Abs                                |

| General information                         |                  |                                                                                 |                                                            |                                                   |                                                                                                                                                             |                                           | Temperature (T) & Ablation Zone (AZ) |                                                                                                                                                                        |                                                                                                                            |              |                                                             |                                    |
|---------------------------------------------|------------------|---------------------------------------------------------------------------------|------------------------------------------------------------|---------------------------------------------------|-------------------------------------------------------------------------------------------------------------------------------------------------------------|-------------------------------------------|--------------------------------------|------------------------------------------------------------------------------------------------------------------------------------------------------------------------|----------------------------------------------------------------------------------------------------------------------------|--------------|-------------------------------------------------------------|------------------------------------|
| Author (year)                               | Model            | Organ & Location                                                                | N (samples, AZ)                                            | Generator & Pulse type                            | Electrode type & Manufacturer                                                                                                                               | Varied electroporation parameter settings | Focus on T or AZ                     | Visualization AZ & Endpoint                                                                                                                                            | Method AZ measurements & Orientation to needles                                                                            | 1D/2D /3D AZ | Method & Location temperature measurements                  | Absolute (Abs) or Relative (Rel) T |
| <b>Edelblute et al. (2017)</b> <sup>6</sup> | Mice, In vivo    | Pancreas; Pancreatic adenocarcinoma cells injected and grown in left flank mice | Both not described                                         | BTX ECM 830; Square                               | Four needle electrode array with 5 mm (between anode-anode, cathode-cathode) x 7 mm (between anode-cathode) gaps; Manufacturer or custom-made not specified | Voltage                                   | T                                    | NA                                                                                                                                                                     | NA                                                                                                                         | NA           | Thermopile temperature sensor using the 4 needle electrodes | Rel                                |
| <b>Lee et al. (2013)</b> <sup>7</sup>       | Porcine, In vivo | Liver, Location not specified                                                   | 4 animals; 19 AZ, of which 9 AZ used for size measurements | Prototype IRE generator; Pulse type not specified | Two monopolar (18 Gauge) electrodes; Ethicon Endo-surgery                                                                                                   | Inter-electrode distance                  | AZ                                   | CT imaging and gross pathologic examination (TTC stained for 1 hour and fixed with formalin); CT imaging immediately after IRE and liver harvested 5-6 hours after IRE | 3D image analysis software (Vitrea 2) and macroscopic measurements; Perpendicular and parallel to electrode insertion path | 1D           | NA                                                          | NA                                 |
| <b>Lv et al. (2019)</b> <sup>8</sup>        | Potato           | NA; Potato slices, electrodes inserted normal to the potato slice surface       | Number of used potato slices and AZ not specified          | BTX ECM 830; Square                               | Two monopolar stainless steel electrodes (Ø 1 mm); Manufacturer or custom-made not specified                                                                | Pulse number                              | AZ                                   | Macroscopic visualization by photographs of darkened area; 12 hours after ablation                                                                                     | Ablated area calculated by macroscopic measurements with ImageJ; Perpendicular to electrode insertion path                 | 2D           | NA                                                          | NA                                 |
| <b>Neal et al. (2014)</b> <sup>9</sup>      | Canine, In vivo  | Kidney; Superior, middle or lower lobe                                          | Not described for the specific experiments                 | BTX ECM 830; Square                               | Two monopolar (18 Gauge, Ø 1 mm) electrodes;                                                                                                                | Voltage                                   | AZ                                   | Gross pathologic examination; Harvested 6                                                                                                                              | Macroscopic measurements with ImageJ to determine length and width;                                                        | 1D and 2D    | NA                                                          | NA                                 |

| General information                         |                                        |                                                                                                             |                                                                                               |                                    |                                           |                                           | Temperature (T) & Ablation Zone (AZ) |                                                                                                                                                                   |                                                 |              |                                                                                                                                                                                                                                       |                                    |
|---------------------------------------------|----------------------------------------|-------------------------------------------------------------------------------------------------------------|-----------------------------------------------------------------------------------------------|------------------------------------|-------------------------------------------|-------------------------------------------|--------------------------------------|-------------------------------------------------------------------------------------------------------------------------------------------------------------------|-------------------------------------------------|--------------|---------------------------------------------------------------------------------------------------------------------------------------------------------------------------------------------------------------------------------------|------------------------------------|
| Author (year)                               | Model                                  | Organ & Location                                                                                            | N (samples, AZ)                                                                               | Generator & Pulse type             | Electrode type & Manufacturer             | Varied electroporation parameter settings | Focus on T or AZ                     | Visualization AZ & Endpoint                                                                                                                                       | Method AZ measurements & Orientation to needles | 1D/2D /3D AZ | Method & Location temperature measurements                                                                                                                                                                                            | Absolute (Abs) or Relative (Rel) T |
|                                             |                                        |                                                                                                             | included in this review; Experiments were repeated at least 4 times per setup → at least 8 AZ |                                    | Manufacturer or custom-made not specified |                                           |                                      | hours after IRE ablation, kidney sections containing AZ were preserved in 10% buffered formalin for 48 hours before sliced, photographed and analyzed with ImageJ | Perpendicular to electrode insertion path       |              |                                                                                                                                                                                                                                       |                                    |
| <b>Ruarus et al. (2018)</b> <sup>10</sup>   | Potato; Gel (Polyacrylamide)           | NA; <u>Location potato</u> Not specified<br><br><u>Location gel</u> Electrodes placed 5 mm from gel surface | Number of potato and gel experiments not specified                                            | NanoKnife<br>AngioDynamics; Square | Two monopolar electrodes; AngioDynamics   | Pulse protocol                            | T                                    | NA                                                                                                                                                                | NA                                              | NA           | Two fiber-optic temperature probes (Ø 1 mm), one placed in the middle between both electrodes and the other 5 mm medial from an electrode tip. Temperature measured prior, during and after pulse delivery until returned to baseline | Rel                                |
| <b>Scheffer et al. (2016)</b> <sup>11</sup> | Gel (Polyacrylamide); Porcine, In vivo | <u>Gel</u> NA; Electrodes placed 5 mm from gel surface<br><br><u>Porcine</u> Liver, Location not specified  | <u>Gel</u> 10; 10 AZ (N = 5 per experiment)<br><br><u>Porcine</u> 1 animal; 2 AZ              | NanoKnife<br>AngioDynamics; Square | Two monopolar electrodes; AngioDynamics   | Pulse number                              | T                                    | NA                                                                                                                                                                | NA                                              | NA           | <u>Gel</u> Thermal camera (thermal changes of 0.05 °C); Surface around the electrodes, placed 5 mm from the surface<br><br><u>Porcine</u> Two fiber-optic temperature probes (Ø 1 mm)                                                 | Rel                                |

| Author (year)                                  | General information  |                                                                                                          |                                                                                                                                                                       |                                 |                                                              |                                                                                                          | Temperature (T) & Ablation Zone (AZ) |                             |                                                 |              |                                                                                                                                                                                                                 |                                    |
|------------------------------------------------|----------------------|----------------------------------------------------------------------------------------------------------|-----------------------------------------------------------------------------------------------------------------------------------------------------------------------|---------------------------------|--------------------------------------------------------------|----------------------------------------------------------------------------------------------------------|--------------------------------------|-----------------------------|-------------------------------------------------|--------------|-----------------------------------------------------------------------------------------------------------------------------------------------------------------------------------------------------------------|------------------------------------|
|                                                | Model                | Organ & Location                                                                                         | N (samples, AZ)                                                                                                                                                       | Generator & Pulse type          | Electrode type & Manufacturer                                | Varied electroporation parameter settings                                                                | Focus on T or AZ                     | Visualization AZ & Endpoint | Method AZ measurements & Orientation to needles | 1D/2D /3D AZ | Method & Location temperature measurements                                                                                                                                                                      | Absolute (Abs) or Relative (Rel) T |
| <b>Van den Bos et al. (2015)</b> <sup>12</sup> | Gel (Polyacrylamide) | NA; Electrodes placed 5 mm ± 1 mm from gel surface. Proximal aspect active tip 4 cm from top surface gel | N = 5 to test average temperature difference and standard deviation for reproducibility. N = 27 to investigate every single parameter variation (N = 1 per variation) | NanoKnife AngioDynamics; Square | Two monopolar (19 Gauge) electrodes; AngioDynamics           | Voltage, inter-electrode distance, active needle length, pulse length, pulse protocol and pulse interval | T                                    | NA                          | NA                                              | NA           | placed 0.5 cm medial to both electrodes at equal depth with electrode tips (temperature change of 0.05 °C). Liver surface temperature measured by thermal camera (thermal changes of 0.05 °C)                   | Abs and Rel                        |
| <b>Wagstaff et al. (2014)</b> <sup>13</sup>    | Porcine, In vivo     | Kidney; Both kidneys, exact location not specified                                                       | 4 animals; 8 kidneys; 6 AZ (3 per configuration)                                                                                                                      | NanoKnife AngioDynamics; Square | Three or four monopolar (19 Gauge) electrodes; AngioDynamics | Number of electrodes                                                                                     | T                                    | NA                          | NA                                              | NA           | <u>Tissue surface temperature</u><br>Thermal camera (temperature changes of 0.05 °C)<br><br><u>Temperature within tissue</u><br>4 fiber-optic temperature probes (T <sup>1</sup> -T <sup>4</sup> ) (temperature | Abs                                |

| General information             |                 |                              |                                                                                                 |                        |                                                                                               |                                           | Temperature (T) & Ablation Zone (AZ) |                                                                                                                        |                                                                                                                                                                   |              |                                                                                     |                                    |
|---------------------------------|-----------------|------------------------------|-------------------------------------------------------------------------------------------------|------------------------|-----------------------------------------------------------------------------------------------|-------------------------------------------|--------------------------------------|------------------------------------------------------------------------------------------------------------------------|-------------------------------------------------------------------------------------------------------------------------------------------------------------------|--------------|-------------------------------------------------------------------------------------|------------------------------------|
| Author (year)                   | Model           | Organ & Location             | N (samples, AZ)                                                                                 | Generator & Pulse type | Electrode type & Manufacturer                                                                 | Varied electroporation parameter settings | Focus on T or AZ                     | Visualization AZ & Endpoint                                                                                            | Method AZ measurements & Orientation to needles                                                                                                                   | 1D/2D /3D AZ | Method & Location temperature measurements                                          | Absolute (Abs) or Relative (Rel) T |
|                                 |                 |                              |                                                                                                 |                        |                                                                                               |                                           |                                      |                                                                                                                        |                                                                                                                                                                   |              | changes of 0.05 °C)                                                                 |                                    |
|                                 |                 |                              |                                                                                                 |                        |                                                                                               |                                           |                                      |                                                                                                                        |                                                                                                                                                                   |              | 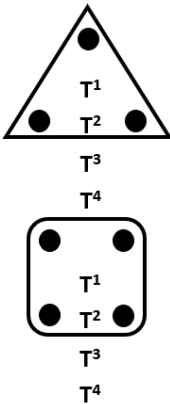 |                                    |
| Yao et al. (2017) <sup>14</sup> | Rabbit, In vivo | Liver; Different lobes       | Not described for the specific experiments included in this review                              | Custom-made; Square    | Two monopolar stainless steel electrodes (∅ 1 mm) ; Manufacturer or custom-made not specified | Voltage                                   | AZ                                   | Histologic examination; Harvested 72 hours following ablation, fixed in formalin, embedded in paraffin, H&E and imaged | Microscopic measurements, a pathologist depicted the length, width and area of the periphery AZ on H&E stained slices; Perpendicular to electrodes insertion path | 1D           | NA                                                                                  | NA                                 |
| Yao et al. (2017) <sup>15</sup> | Rabbit, In vivo | Liver; Different lobes       | Not described for the specific experiments included in this review; 3 AZ per experiment (18 AZ) | Custom-made; Square    | Two monopolar stainless steel electrodes (∅ 1 mm) ; Manufacturer or custom-made not specified | Voltage                                   | AZ                                   | Gross pathologic examination; Harvested 72 hours following ablation and imaged                                         | ImageJ was used to calculate the ablated area in photographs of fresh liver tissue samples; Perpendicular to electrodes insertion path                            | 2D           | NA                                                                                  | NA                                 |
| Yao et al. (2017) <sup>16</sup> | Potato          | NA; Cylindrical potato slice | Experiments were repeated at least 3 times                                                      | Custom-made; Square    | Four pairs of monopolar                                                                       | Voltage and pulse number                  | AZ                                   | Macroscopic visualization by photographs of                                                                            | Macroscopic measurements with ImageJ and Matlab                                                                                                                   | 2D           | NA                                                                                  | NA                                 |



| General information                         |              |                                                            |                                                         |                        |                                                                                       |                                                    | Temperature (T) & Ablation Zone (AZ) |                                                                                                                                                                                             |                                                                                                                                                                                                                                                  |              |                                            |                                    |
|---------------------------------------------|--------------|------------------------------------------------------------|---------------------------------------------------------|------------------------|---------------------------------------------------------------------------------------|----------------------------------------------------|--------------------------------------|---------------------------------------------------------------------------------------------------------------------------------------------------------------------------------------------|--------------------------------------------------------------------------------------------------------------------------------------------------------------------------------------------------------------------------------------------------|--------------|--------------------------------------------|------------------------------------|
| Author (year)                               | Model        | Organ & Location                                           | N (samples, AZ)                                         | Generator & Pulse type | Electrode type & Manufacturer                                                         | Varied electroporation parameter settings          | Focus on T or AZ                     | Visualization AZ & Endpoint                                                                                                                                                                 | Method AZ measurements & Orientation to needles                                                                                                                                                                                                  | 1D/2D /3D AZ | Method & Location temperature measurements | Absolute (Abs) or Relative (Rel) T |
|                                             |              | with a diameter of 50 mm and height of 6 mm                | per experiment → at least 12 potato slices and 12 AZ    |                        | stainless steel electrodes (∅ 0.6 mm) ; Manufacturer or custom-made not specified     |                                                    |                                      | darkened area; 12 hours after ablation                                                                                                                                                      | were used to calculate ablation area; Perpendicular to electrode insertion path                                                                                                                                                                  |              |                                            |                                    |
| <b>Zhang et al. (2010)</b><br><sup>17</sup> | Rat, In vivo | Liver; Center left lateral lobe                            | 18 animals; 18 AZ                                       | BTX ECM 830; Square    | Two monopolar Pt-Ir electrodes (∅ 0.4 mm) ; Manufacturer or custom-made not specified | Voltage                                            | AZ                                   | Imaging (T1-weighted GRE and T2-weighted TSE) and histology (sliced at 3 mm interval and H&E stained); Imaging acquired immediately after IRE, Livers harvested 72 hours following ablation | <u>Imaging</u> Measurements of delineated ablation zones on MR imaging; Perpendicular to electrode insertion path<br><br><u>Histology</u> ImageJ was used to delineate and measure the ablation zone; Perpendicular to electrodes insertion path | 2D           | NA                                         | NA                                 |
| <b>Zhang et al. (2018)</b><br><sup>18</sup> | Potato       | NA; Electrodes are inserted along long axis of the potato. | 100; 100 (20 different experiments, N=5 per experiment) | Custom-made; Square    | Two custom-made monopolar Ni-Ti alloy electrodes (∅ 1 mm)                             | Pulse protocol, pulse frequency and pulse interval | AZ                                   | Macroscopic visualization, 24 hours after ablation                                                                                                                                          | Macroscopic measurements of darkened AZ in three dimensions (length, width and height) in combination with formula of ellipsoid; Perpendicular to electrode insertion path                                                                       | 1D and 3D    | NA                                         | NA                                 |

**Supplementary S4**

**Electroporation parameter values per included study**

**Table 2.** Electroporation parameter values per included study. Only the electroporation characteristics of the in this review included ablation zone and/or temperature outcomes were described in this table.

| Author (year)                          | Parameters varied in study                                   | Number of electrodes     | IED (mm) | ANL (mm)                                            | Voltage (V)                                                                          | Pulse length (µs)                                     | Pulse number                                                                                            | Pulse protocol                        | Pulse frequency          | Pulse interval (s) | Particularities                                                                                                                                                                  |
|----------------------------------------|--------------------------------------------------------------|--------------------------|----------|-----------------------------------------------------|--------------------------------------------------------------------------------------|-------------------------------------------------------|---------------------------------------------------------------------------------------------------------|---------------------------------------|--------------------------|--------------------|----------------------------------------------------------------------------------------------------------------------------------------------------------------------------------|
| Appelbaum et al. (2014) <sup>1</sup>   | Pulse number                                                 | 4 (Square configuration) | 25       | 20                                                  | 3000                                                                                 | 100                                                   | Multiple sets of 20 pulses per electrode pair were delivered.                                           | 4 x 20<br>6 x 20<br>8 x 20<br>10 x 20 | ECG gated pulse delivery |                    |                                                                                                                                                                                  |
| Ben-David et al. (2012) <sup>2</sup>   | Voltage, active needle length, pulse length and pulse number | 2                        | 15       | 10, 20 and 30                                       | 2250                                                                                 | 20, 50, 70, 90 and 100                                | 20, 50, 70 and 90                                                                                       |                                       | ECG gated pulse delivery |                    |                                                                                                                                                                                  |
| Berkenbrock et al. (2018) <sup>3</sup> | Voltage                                                      | 2                        | 3        | 5                                                   | 210 – 390 with 60 V interval                                                         | 100                                                   | 8                                                                                                       | 1 x 8                                 | 1 pulse/s                |                    |                                                                                                                                                                                  |
| Bhonsle et al. (2016) <sup>4</sup>     | Voltage and pulse number                                     | 2                        | 15       | <u>POM</u><br>10 and 20<br><br><u>In vivo</u><br>10 | <u>POM</u><br>1875, 2250, 2625, 2650 and 3000<br><br><u>In vivo</u><br>1875 and 2625 | <u>POM</u><br>70 and 100<br><br><u>In vivo</u><br>100 | <u>POM</u><br>50, 70, 90, 100, 150, 200, 300, 400 and 600<br><br><u>In vivo</u><br>50, 100, 200 and 400 |                                       | 1 pulse/s                |                    | <u>In vivo</u><br>Polarity reversed every 50 pulses. After pulse 10 and 50 a 5s pause to store the data                                                                          |
| Canvasser et al. (2018) <sup>5</sup>   | Voltage and active needle length                             | 2                        | 15       | 10 and 15                                           | 1500, 2250 and 3000                                                                  | 100                                                   | 140                                                                                                     | 70-70                                 | ECG gated pulse delivery |                    | 70 straight pulses followed by 70 pulses of reversed polarity                                                                                                                    |
| Edelblute et al. (2017) <sup>6</sup>   | Voltage                                                      | 4                        | 7        | 3                                                   | 1400 and 1750                                                                        | 100                                                   | 90                                                                                                      |                                       | 1 pulse/s                |                    | 7 mm gap between the anode and cathode, each 2 electrodes. 5 mm gap between electrodes of the same polarity. Electrodes of the same polarity in a straight line on the same side |

| Author (year)                           | Parameters varied in study                                                                               | Number of electrodes | IED (mm)                       | ANL (mm)                  | Voltage (V)                                      | Pulse length (µs) | Pulse number                                          | Pulse protocol                                                                                                                                                                               | Pulse frequency | Pulse interval (s)                                | Particularities                   |
|-----------------------------------------|----------------------------------------------------------------------------------------------------------|----------------------|--------------------------------|---------------------------|--------------------------------------------------|-------------------|-------------------------------------------------------|----------------------------------------------------------------------------------------------------------------------------------------------------------------------------------------------|-----------------|---------------------------------------------------|-----------------------------------|
| Lee et al. (2013) <sup>7</sup>          | Inter-electrode distance                                                                                 | 2                    | 10 - 17.5 with 2.5 mm interval | 20                        | 3000                                             | 10                | 60                                                    | 6 x 10                                                                                                                                                                                       |                 |                                                   |                                   |
| Lv et al. (2019) <sup>8</sup>           | Pulse number                                                                                             | 2                    | 5                              | 5                         | 500                                              | 100               | 10 and 50                                             |                                                                                                                                                                                              | 1 pulse/s       |                                                   |                                   |
| Neal (2014) <sup>9</sup>                | Voltage                                                                                                  | 2                    | 10                             | 10                        | 1250 and 1750<br><br>50 V pre-pulse              | 100               | 100 (excluding 1 pre-pulse)                           | 1-100                                                                                                                                                                                        | 1 pulse/s       | 5 s pause after pulse 10 and 50 to store the data | Polarity reversed after 50 pulses |
| Ruarus et al. (2018) <sup>10</sup>      | Pulse protocol                                                                                           | 2                    | 20                             | 20                        | 2000                                             | 90                | 100<br>Protocol was repeated after a cool-down period | 10-90<br>10-30-30-30<br><br>Protocol was repeated after a cool-down period                                                                                                                   |                 |                                                   |                                   |
| Scheffer et al. (2016) <sup>11</sup>    | Pulse number                                                                                             | 2                    | 15                             | 15                        | <u>Gel</u><br>1500<br><br><u>In vivo</u><br>2250 | 90                | 90 and 270                                            | 1 x 90<br>3 x 90                                                                                                                                                                             | 90 pulses/min   |                                                   |                                   |
| Van den Bos et al. (2015) <sup>12</sup> | Voltage, inter-electrode distance, active needle length, pulse length, pulse protocol and pulse interval | 2                    | 5 - 30 with 5 mm interval      | 5 - 25 with 5 mm interval | 500 – 2500 with 500 V interval                   | 50, 70 and 90     | 90 and 120                                            | 1 x 90<br>2 x 60<br>4 x 30<br>6 x 20                                                                                                                                                         | 90 pulses/min   | 30, 60 and 90                                     |                                   |
| Wagstaff et al. (2014) <sup>13</sup>    | Number of electrodes                                                                                     | 3 and 4              | 15                             | 15                        | 2250                                             | 90                | 70 pulses per electrode pair                          | <u>3 needle configuration</u><br>3 x 70 for all electrode pairs and 1 x 70 per single pair<br><br><u>4 needle configuration</u><br>6 x 70 for all electrode pairs and 1 x 70 per single pair | 90 pulses/min   |                                                   |                                   |

| Author (year)                     | Parameters varied in study                         | Number of electrodes | IED (mm) | ANL (mm) | Voltage (V)              | Pulse length ( $\mu$ s) | Pulse number | Pulse protocol                       | Pulse frequency                  | Pulse interval (s) | Particularities                                                                                                                                                                                       |
|-----------------------------------|----------------------------------------------------|----------------------|----------|----------|--------------------------|-------------------------|--------------|--------------------------------------|----------------------------------|--------------------|-------------------------------------------------------------------------------------------------------------------------------------------------------------------------------------------------------|
| Yao et al. (2017) <sup>14</sup>   | Voltage                                            | 2                    | 4        | 8        | 240, 360 and 480         | 100                     | 60 and 80    |                                      | 1 pulse/s                        |                    |                                                                                                                                                                                                       |
| Yao et al. (2017) <sup>15</sup>   | Voltage                                            | 2                    | 10       | 8        | 800, 1000, 1250 and 1500 | 100                     | 90           |                                      | 1 pulse/s                        |                    |                                                                                                                                                                                                       |
| Yao et al. (2017) <sup>16</sup>   | Voltage and pulse number                           | 8 (4 pairs)          | 2.5      | 6        | 150, 200 and 250         | 100                     | 60 and 80    |                                      | 1 pulse/s                        |                    | Four pairs of electrodes. 2.5 mm between the anode and cathode, each 4 electrodes. 2 mm between electrodes of the same polarity. Electrodes of the same polarity in a straight line on the same side. |
| Zhang et al. (2010) <sup>17</sup> | Voltage                                            | 2                    | 10       | 12       | 1000, 1500 and 2500      | 100                     | 8            | 1 x 8                                | 1 pulse/100 ms                   |                    |                                                                                                                                                                                                       |
| Zhang et al. (2018) <sup>18</sup> | Pulse protocol, pulse frequency and pulse interval | 2                    | 5        | 5        | 1000                     | 90                      | 90           | 1 x 90<br>2 x 45<br>3 x 30<br>5 x 18 | 1 pulse/200 ms<br>1 pulse/550 ms | 0, 10, 30 and 60   |                                                                                                                                                                                                       |

**Supplementary S5 Additional graphical representations ablation zone per electroporation parameter – not included in the main article**

**Length ablation zone**

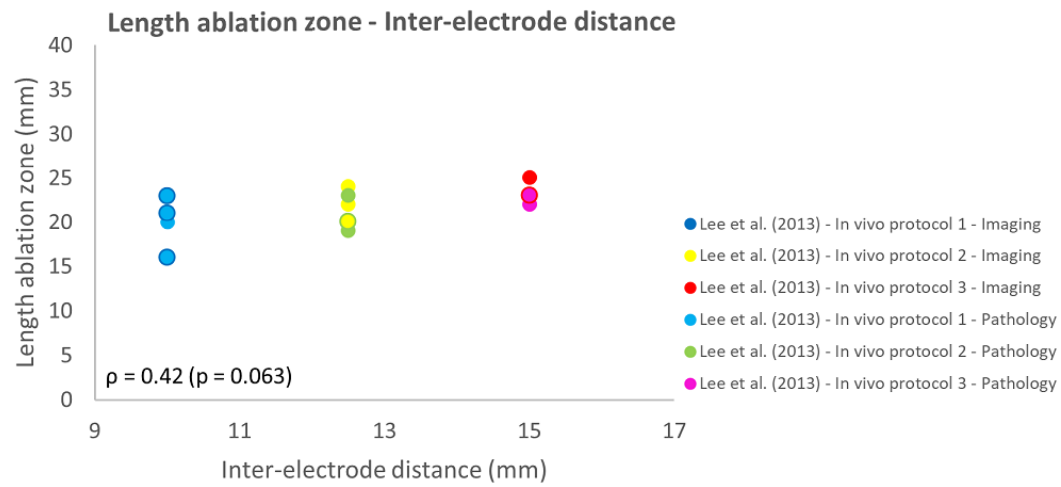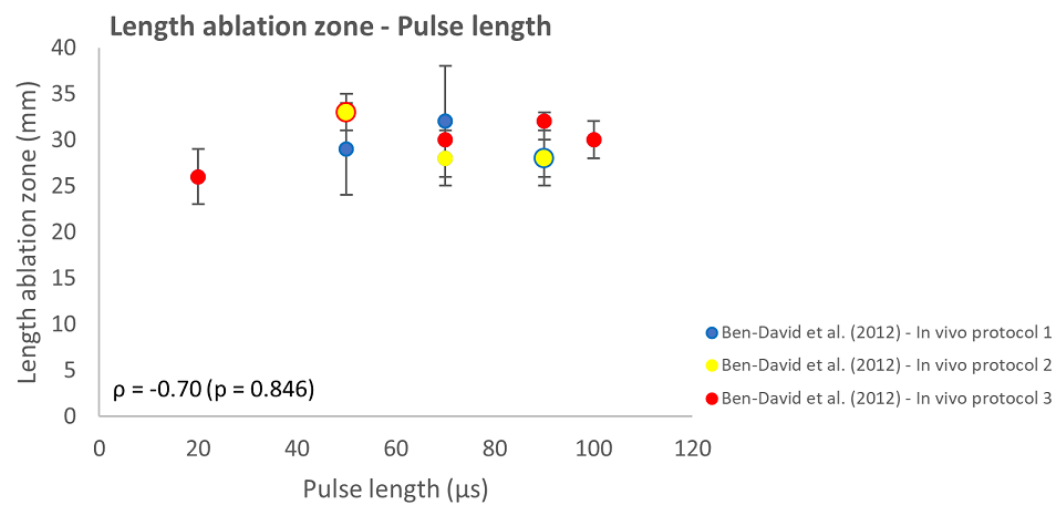

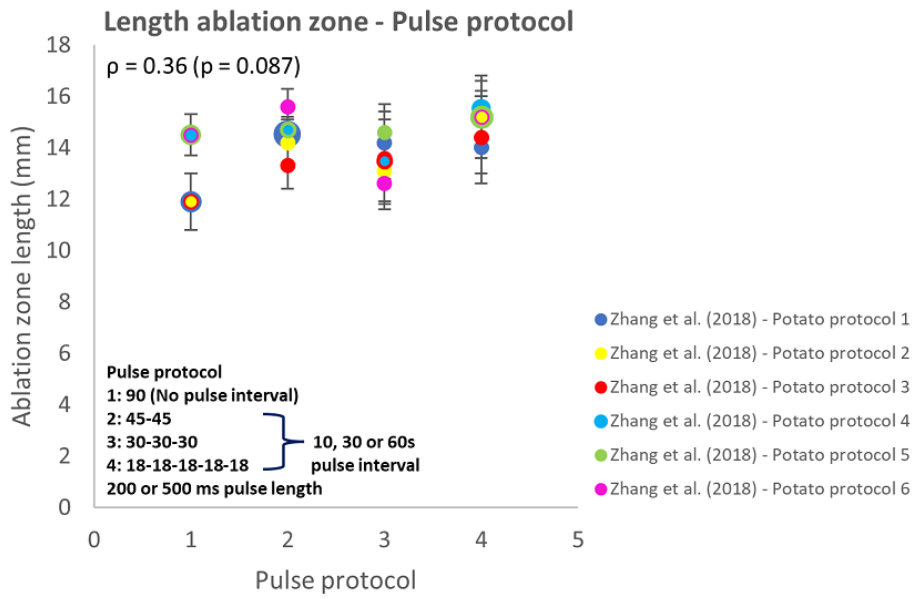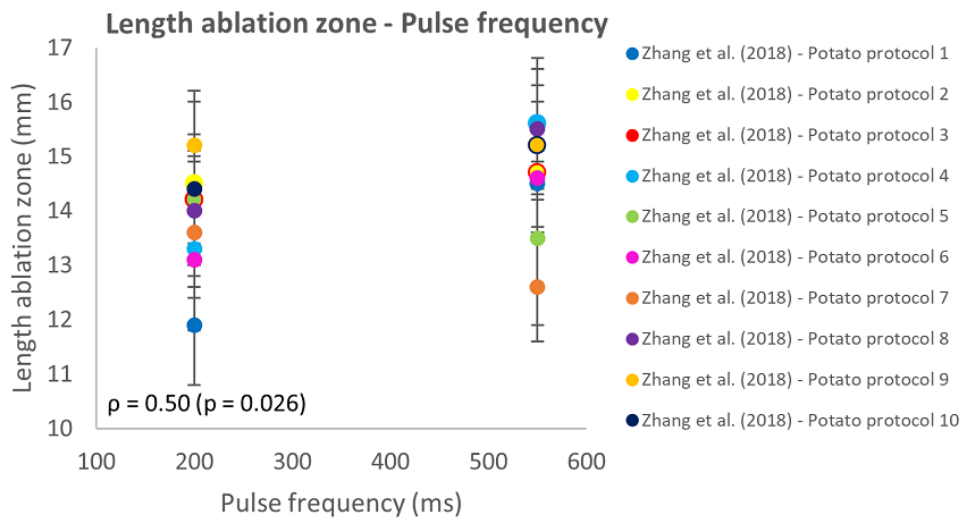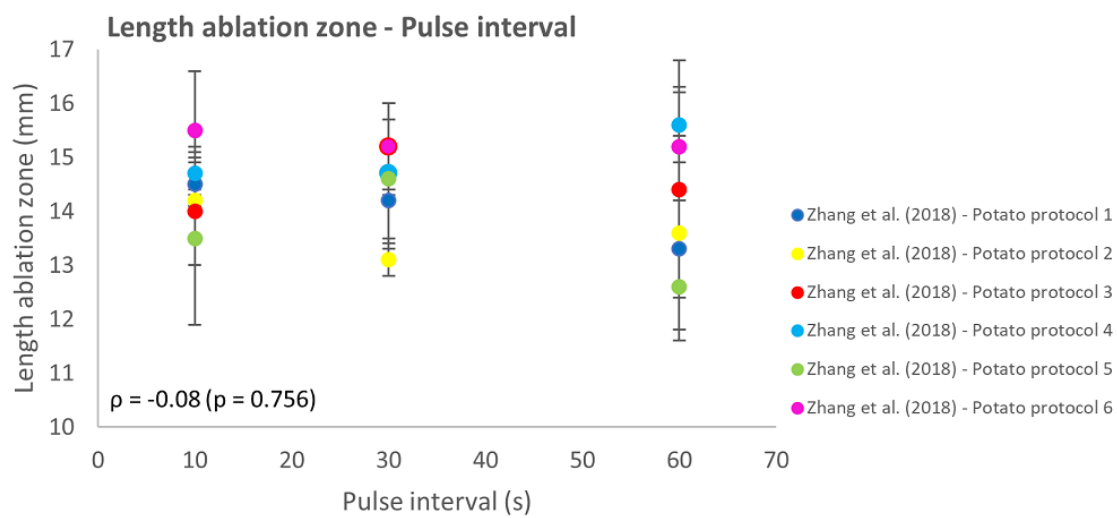

## Surface ablation zone

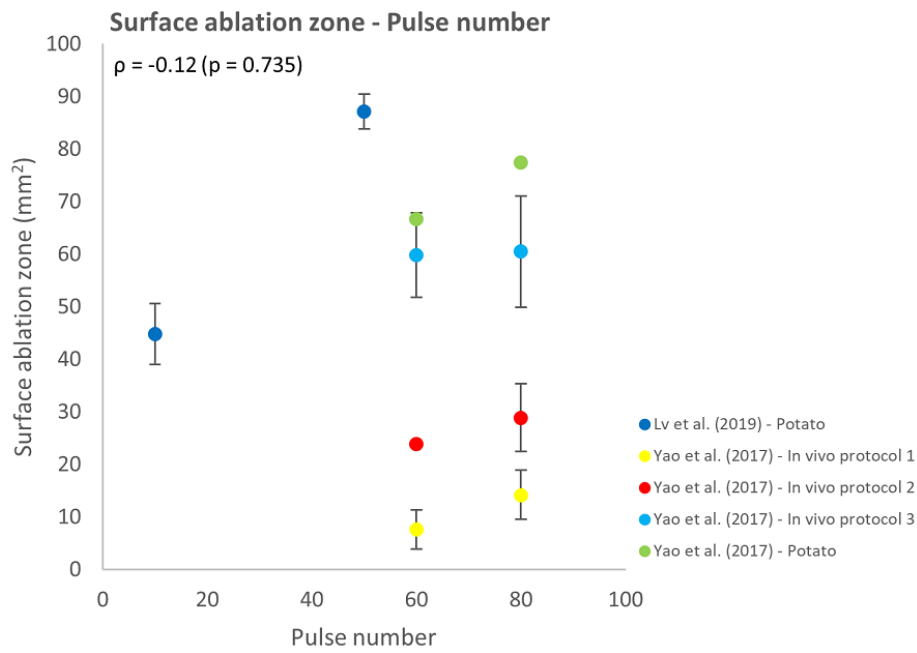

## Volume ablation zone

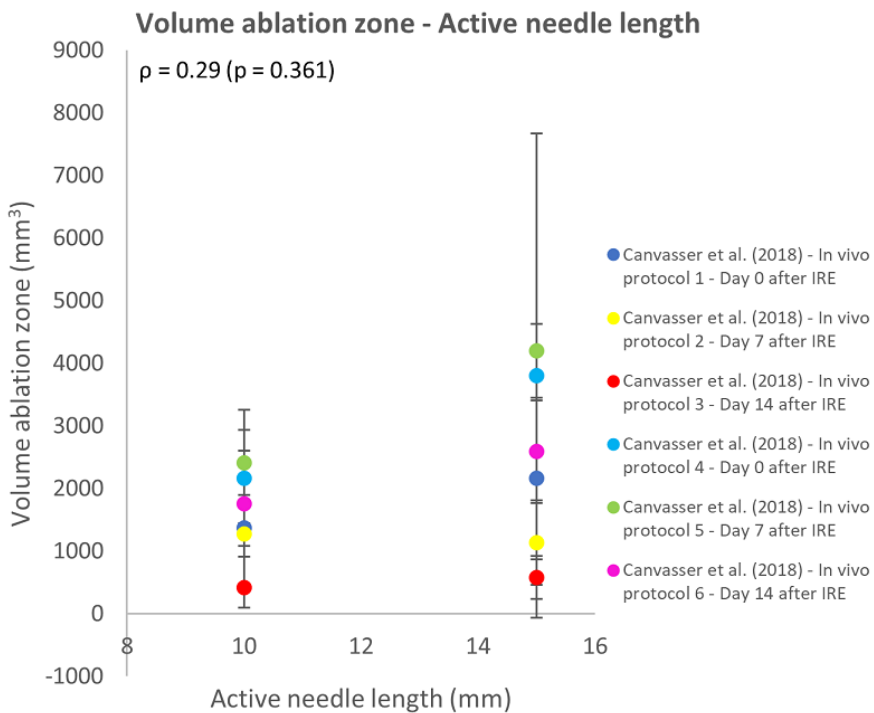

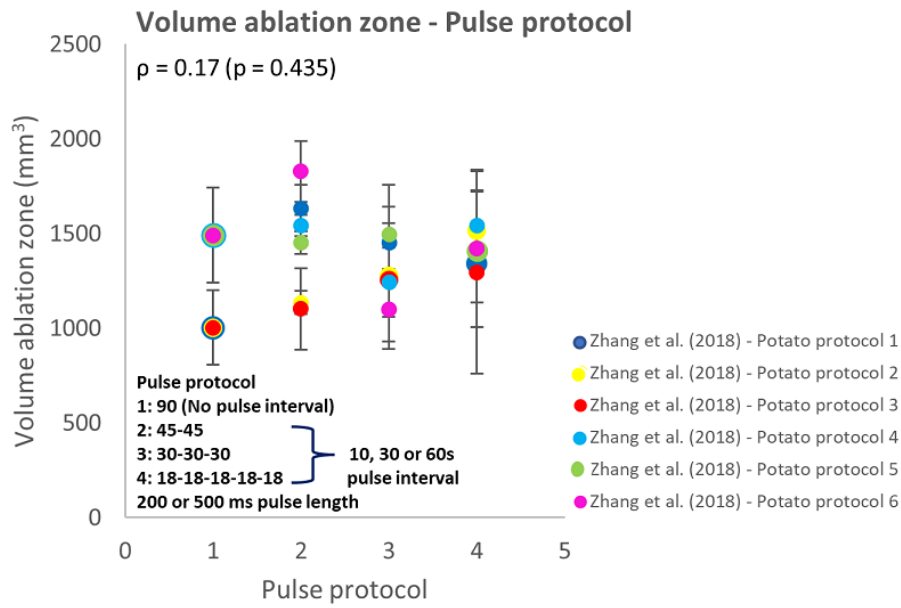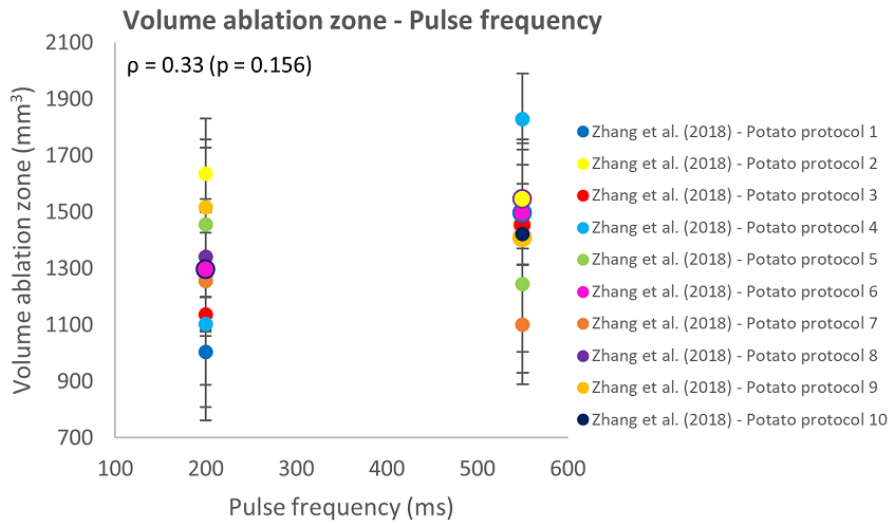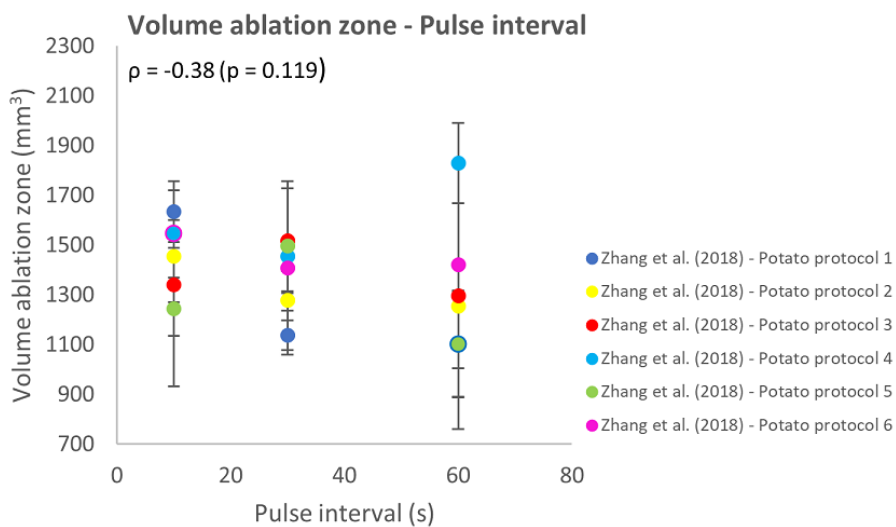



**Supplementary S6 Additional graphical representations temperature effects per electroporation parameter – not included in the main article**

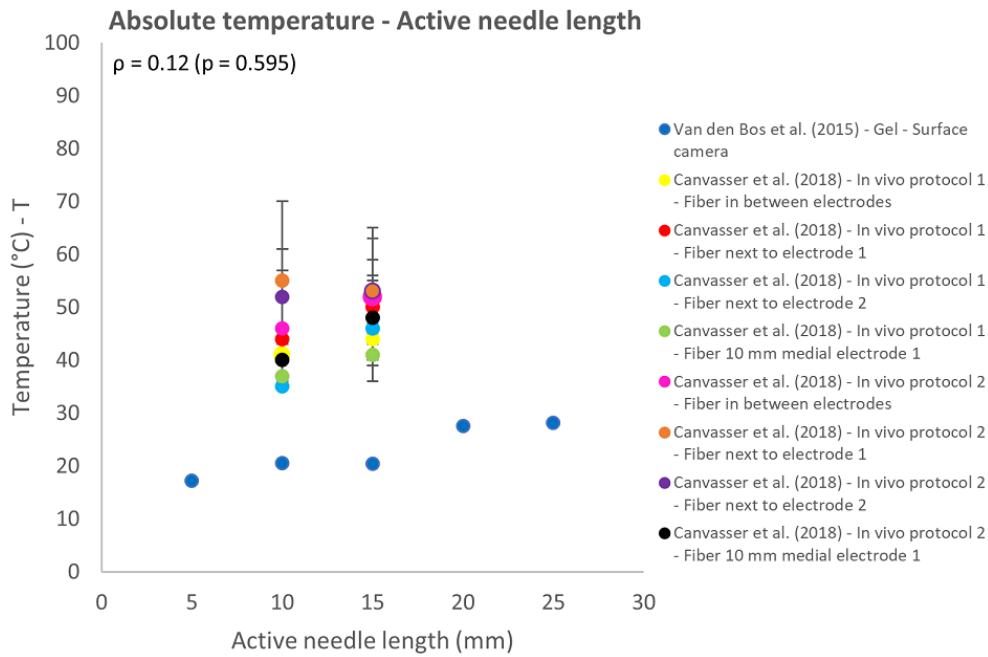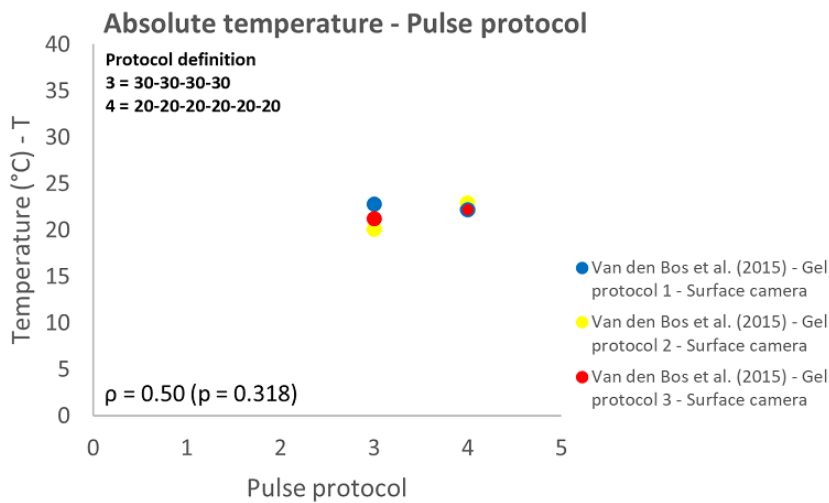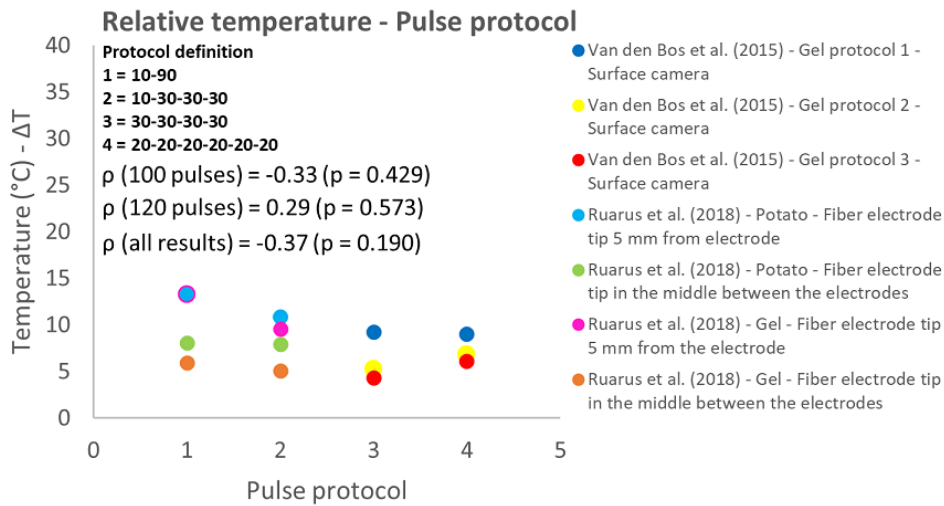

## Supplementary S7

## PRISMA checklist

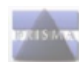

## PRISMA 2020 Checklist

| Section and Topic             | Item # | Checklist item                                                                                                                                                                                                                                                                                       | Location where item is reported |
|-------------------------------|--------|------------------------------------------------------------------------------------------------------------------------------------------------------------------------------------------------------------------------------------------------------------------------------------------------------|---------------------------------|
| <b>TITLE</b>                  |        |                                                                                                                                                                                                                                                                                                      |                                 |
| Title                         | 1      | Identify the report as a systematic review.                                                                                                                                                                                                                                                          | YES                             |
| <b>ABSTRACT</b>               |        |                                                                                                                                                                                                                                                                                                      |                                 |
| Abstract                      | 2      | See the PRISMA 2020 for Abstracts checklist.                                                                                                                                                                                                                                                         | YES                             |
| <b>INTRODUCTION</b>           |        |                                                                                                                                                                                                                                                                                                      |                                 |
| Rationale                     | 3      | Describe the rationale for the review in the context of existing knowledge.                                                                                                                                                                                                                          | YES                             |
| Objectives                    | 4      | Provide an explicit statement of the objective(s) or question(s) the review addresses.                                                                                                                                                                                                               | YES                             |
| <b>METHODS</b>                |        |                                                                                                                                                                                                                                                                                                      |                                 |
| Eligibility criteria          | 5      | Specify the inclusion and exclusion criteria for the review and how studies were grouped for the syntheses.                                                                                                                                                                                          | YES                             |
| Information sources           | 6      | Specify all databases, registers, websites, organisations, reference lists and other sources searched or consulted to identify studies. Specify the date when each source was last searched or consulted.                                                                                            | YES                             |
| Search strategy               | 7      | Present the full search strategies for all databases, registers and websites, including any filters and limits used.                                                                                                                                                                                 | YES                             |
| Selection process             | 8      | Specify the methods used to decide whether a study met the inclusion criteria of the review, including how many reviewers screened each record and each report retrieved, whether they worked independently, and if applicable, details of automation tools used in the process.                     | YES                             |
| Data collection process       | 9      | Specify the methods used to collect data from reports, including how many reviewers collected data from each report, whether they worked independently, any processes for obtaining or confirming data from study investigators, and if applicable, details of automation tools used in the process. | YES                             |
| Data items                    | 10a    | List and define all outcomes for which data were sought. Specify whether all results that were compatible with each outcome domain in each study were sought (e.g. for all measures, time points, analyses), and if not, the methods used to decide which results to collect.                        | YES                             |
|                               | 10b    | List and define all other variables for which data were sought (e.g. participant and intervention characteristics, funding sources). Describe any assumptions made about any missing or unclear information.                                                                                         | YES                             |
| Study risk of bias assessment | 11     | Specify the methods used to assess risk of bias in the included studies, including details of the tool(s) used, how many reviewers assessed each study and whether they worked independently, and if applicable, details of automation tools used in the process.                                    | YES                             |
| Effect measures               | 12     | Specify for each outcome the effect measure(s) (e.g. risk ratio, mean difference) used in the synthesis or presentation of results.                                                                                                                                                                  | YES                             |
| Synthesis methods             | 13a    | Describe the processes used to decide which studies were eligible for each synthesis (e.g. tabulating the study intervention characteristics and comparing against the planned groups for each synthesis (item #5)).                                                                                 | YES                             |
|                               | 13b    | Describe any methods required to prepare the data for presentation or synthesis, such as handling of missing summary statistics, or data conversions.                                                                                                                                                | YES                             |
|                               | 13c    | Describe any methods used to tabulate or visually display results of individual studies and syntheses.                                                                                                                                                                                               | YES                             |
|                               | 13d    | Describe any methods used to synthesize results and provide a rationale for the choice(s). If meta-analysis was performed, describe the model(s), method(s) to identify the presence and extent of statistical heterogeneity, and software package(s) used.                                          | YES                             |
|                               | 13e    | Describe any methods used to explore possible causes of heterogeneity among study results (e.g. subgroup analysis, meta-regression).                                                                                                                                                                 | YES                             |
|                               | 13f    | Describe any sensitivity analyses conducted to assess robustness of the synthesized results.                                                                                                                                                                                                         | NA                              |
| Reporting bias assessment     | 14     | Describe any methods used to assess risk of bias due to missing results in a synthesis (arising from reporting biases).                                                                                                                                                                              | NA                              |
| Certainty assessment          | 15     | Describe any methods used to assess certainty (or confidence) in the body of evidence for an outcome.                                                                                                                                                                                                | YES                             |

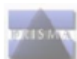

## PRISMA 2020 Checklist

| Section and Topic                              | Item # | Checklist item                                                                                                                                                                                                                                                                       | Location where item is reported |
|------------------------------------------------|--------|--------------------------------------------------------------------------------------------------------------------------------------------------------------------------------------------------------------------------------------------------------------------------------------|---------------------------------|
| <b>RESULTS</b>                                 |        |                                                                                                                                                                                                                                                                                      |                                 |
| Study selection                                | 16a    | Describe the results of the search and selection process, from the number of records identified in the search to the number of studies included in the review, ideally using a flow diagram.                                                                                         | YES                             |
|                                                | 16b    | Cite studies that might appear to meet the inclusion criteria, but which were excluded, and explain why they were excluded.                                                                                                                                                          | YES                             |
| Study characteristics                          | 17     | Cite each included study and present its characteristics.                                                                                                                                                                                                                            | YES                             |
| Risk of bias in studies                        | 18     | Present assessments of risk of bias for each included study.                                                                                                                                                                                                                         | YES                             |
| Results of individual studies                  | 19     | For all outcomes, present, for each study: (a) summary statistics for each group (where appropriate) and (b) an effect estimate and its precision (e.g. confidence/credible interval), ideally using structured tables or plots.                                                     | YES                             |
| Results of syntheses                           | 20a    | For each synthesis, briefly summarise the characteristics and risk of bias among contributing studies.                                                                                                                                                                               | YES                             |
|                                                | 20b    | Present results of all statistical syntheses conducted. If meta-analysis was done, present for each the summary estimate and its precision (e.g. confidence/credible interval) and measures of statistical heterogeneity. If comparing groups, describe the direction of the effect. | YES                             |
|                                                | 20c    | Present results of all investigations of possible causes of heterogeneity among study results.                                                                                                                                                                                       | YES                             |
|                                                | 20d    | Present results of all sensitivity analyses conducted to assess the robustness of the synthesized results.                                                                                                                                                                           | NA                              |
| Reporting biases                               | 21     | Present assessments of risk of bias due to missing results (arising from reporting biases) for each synthesis assessed.                                                                                                                                                              | NA                              |
| Certainty of evidence                          | 22     | Present assessments of certainty (or confidence) in the body of evidence for each outcome assessed.                                                                                                                                                                                  | YES                             |
| <b>DISCUSSION</b>                              |        |                                                                                                                                                                                                                                                                                      |                                 |
| Discussion                                     | 23a    | Provide a general interpretation of the results in the context of other evidence.                                                                                                                                                                                                    | YES                             |
|                                                | 23b    | Discuss any limitations of the evidence included in the review.                                                                                                                                                                                                                      | YES                             |
|                                                | 23c    | Discuss any limitations of the review processes used.                                                                                                                                                                                                                                | YES                             |
|                                                | 23d    | Discuss implications of the results for practice, policy, and future research.                                                                                                                                                                                                       | YES                             |
| <b>OTHER INFORMATION</b>                       |        |                                                                                                                                                                                                                                                                                      |                                 |
| Registration and protocol                      | 24a    | Provide registration information for the review, including register name and registration number, or state that the review was not registered.                                                                                                                                       | YES                             |
|                                                | 24b    | Indicate where the review protocol can be accessed, or state that a protocol was not prepared.                                                                                                                                                                                       | YES                             |
|                                                | 24c    | Describe and explain any amendments to information provided at registration or in the protocol.                                                                                                                                                                                      | NA                              |
| Support                                        | 25     | Describe sources of financial or non-financial support for the review, and the role of the funders or sponsors in the review.                                                                                                                                                        | YES                             |
| Competing interests                            | 26     | Declare any competing interests of review authors.                                                                                                                                                                                                                                   | YES                             |
| Availability of data, code and other materials | 27     | Report which of the following are publicly available and where they can be found: template data collection forms; data extracted from included studies; data used for all analyses; analytic code; any other materials used in the review.                                           | YES                             |

## Supplementary S8

## PRISMA abstract checklist

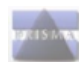

## PRISMA 2020 for Abstracts Checklist

| Section and Topic       | Item # | Checklist item                                                                                                                                                                                                                                                                                        | Reported (Yes/No) |
|-------------------------|--------|-------------------------------------------------------------------------------------------------------------------------------------------------------------------------------------------------------------------------------------------------------------------------------------------------------|-------------------|
| <b>TITLE</b>            |        |                                                                                                                                                                                                                                                                                                       |                   |
| Title                   | 1      | Identify the report as a systematic review.                                                                                                                                                                                                                                                           | YES               |
| <b>BACKGROUND</b>       |        |                                                                                                                                                                                                                                                                                                       |                   |
| Objectives              | 2      | Provide an explicit statement of the main objective(s) or question(s) the review addresses.                                                                                                                                                                                                           | YES               |
| <b>METHODS</b>          |        |                                                                                                                                                                                                                                                                                                       |                   |
| Eligibility criteria    | 3      | Specify the inclusion and exclusion criteria for the review.                                                                                                                                                                                                                                          | YES               |
| Information sources     | 4      | Specify the information sources (e.g. databases, registers) used to identify studies and the date when each was last searched.                                                                                                                                                                        | YES               |
| Risk of bias            | 5      | Specify the methods used to assess risk of bias in the included studies.                                                                                                                                                                                                                              | YES               |
| Synthesis of results    | 6      | Specify the methods used to present and synthesise results.                                                                                                                                                                                                                                           | YES               |
| <b>RESULTS</b>          |        |                                                                                                                                                                                                                                                                                                       |                   |
| Included studies        | 7      | Give the total number of included studies and participants and summarise relevant characteristics of studies.                                                                                                                                                                                         | YES               |
| Synthesis of results    | 8      | Present results for main outcomes, preferably indicating the number of included studies and participants for each. If meta-analysis was done, report the summary estimate and confidence/credible interval. If comparing groups, indicate the direction of the effect (i.e. which group is favoured). | YES               |
| <b>DISCUSSION</b>       |        |                                                                                                                                                                                                                                                                                                       |                   |
| Limitations of evidence | 9      | Provide a brief summary of the limitations of the evidence included in the review (e.g. study risk of bias, inconsistency and imprecision).                                                                                                                                                           | YES               |
| Interpretation          | 10     | Provide a general interpretation of the results and important implications.                                                                                                                                                                                                                           | YES               |
| <b>OTHER</b>            |        |                                                                                                                                                                                                                                                                                                       |                   |
| Funding                 | 11     | Specify the primary source of funding for the review.                                                                                                                                                                                                                                                 | YES               |
| Registration            | 12     | Provide the register name and registration number.                                                                                                                                                                                                                                                    | YES/YES           |

From: Page MJ, McKenzie JE, Bossuyt PM, Boutron I, Hoffmann TC, Mulrow CD, et al. The PRISMA 2020 statement: an updated guideline for reporting systematic reviews. *BMJ* 2021;372:n71. doi: 10.1136/bmj.n71

For more information, visit: <http://www.prisma-statement.org/>

## References

- 1 Appelbaum, L. *et al.* Irreversible electroporation ablation: creation of large-volume ablation zones in in vivo porcine liver with four-electrode arrays. *Radiology* **270**, 416-424 (2014).
- 2 Ben-David, E., Appelbaum, L., Sosna, J., Nissenbaum, I. & Goldberg, S. N. Characterization of irreversible electroporation ablation in in vivo porcine liver. *American Journal of Roentgenology* **198**, W62-W68 (2012).
- 3 Berkenbrock, J. A., Pintarelli, G. B., Júnior, A. d. C. A. & Suzuki, D. O. H. Verification of electroporation models using the potato tuber as in vitro simulation. *Journal of Medical and Biological Engineering* **39**, 224-229 (2019).
- 4 Bhonsle, S. *et al.* Characterization of irreversible electroporation ablation with a validated perfused organ model. *Journal of Vascular and Interventional Radiology* **27**, 1913-1922. e1912 (2016).
- 5 Canvasser, N. E. *et al.* Effect of differing parameters on irreversible electroporation in a porcine model. *Journal of endourology* **32**, 338-343 (2018).
- 6 Edelblute, C. M. *et al.* Controllable moderate heating enhances the therapeutic efficacy of irreversible electroporation for pancreatic cancer. *Scientific reports* **7**, 1-11 (2017).
- 7 Lee, Y. J., Lu, D. S., Osuagwu, F. & Lassman, C. Irreversible electroporation in porcine liver: acute computed tomography appearance of ablation zone with histopathologic correlation. *Journal of computer assisted tomography* **37**, 154-158 (2013).
- 8 Lv, Y., Yao, C. & Rubinsky, B. A conceivable mechanism responsible for the synergy of high and low voltage irreversible electroporation pulses. *Annals of biomedical engineering* **47**, 1552-1563 (2019).
- 9 Neal, R. E. *et al.* In vivo irreversible electroporation kidney ablation: experimentally correlated numerical models. *IEEE Transactions on Biomedical Engineering* **62**, 561-569 (2014).
- 10 Ruarus, A. H. *et al.* Conductivity rise during irreversible electroporation: True permeabilization or heat? *Cardiovascular and interventional radiology* **41**, 1257-1266 (2018).
- 11 Scheffer, H. J. *et al.* The influence of a metal stent on the distribution of thermal energy during irreversible electroporation. *PLoS One* **11**, e0148457 (2016).
- 12 Van Den Bos, W. *et al.* Thermal energy during irreversible electroporation and the influence of different ablation parameters. *Journal of Vascular and Interventional Radiology* **27**, 433-443 (2016).
- 13 Wagstaff, P. G. *et al.* in *Urologic Oncology: Seminars and Original Investigations*. 168. e161-168. e167 (Elsevier).
- 14 Yao, C. *et al.* Bipolar microsecond pulses and insulated needle electrodes for reducing muscle contractions during irreversible electroporation. *IEEE Transactions on Biomedical Engineering* **64**, 2924-2937 (2017).
- 15 Yao, C. *et al.* Synergistic combinations of short high-voltage pulses and long low-voltage pulses enhance irreversible electroporation efficacy. *Scientific reports* **7**, 1-16 (2017).
- 16 Yao, C., Lv, Y., Dong, S., Zhao, Y. & Liu, H. Irreversible electroporation ablation area enhanced by synergistic high-and low-voltage pulses. *PloS one* **12**, e0173181 (2017).
- 17 Zhang, Y. *et al.* MR imaging to assess immediate response to irreversible electroporation for targeted ablation of liver tissues: preclinical feasibility studies in a rodent model. *Radiology* **256**, 424-432 (2010).
- 18 Zhang, B., Moser, M. A., Zhang, E. M., Xiang, J. & Zhang, W. An in vitro experimental study of the pulse delivery method in irreversible electroporation. *Journal of Engineering and Science in Medical Diagnostics and Therapy* **1** (2018).
